# Supplementary material for: Intermittent hypoxia mediated by TSP1 dependent on STAT3 induces cardiac fibroblast activation and cardiac fibrosis
Source: eLife. 2020 Jan 14;9:e49923. doi: 10.7554/eLife.49923 (PMC6992386; doi:10.7554/eLife.49923)
Supplement: Figure 1—figure supplement 1—source data 1. [file elife-49923-fig1-figsupp1-data1.xlsx]

## Sheet: Sheet1
		PBS		Ang II
		Normoxia	IH	Normoxia	IH
	cardiomyocyte cross-sectional area (μm2)	211.538	210.027	441.348	452.325
		216.77	203.012	395.303	451.289
		197.828	216.626	489.66	423.406
		219.232	215.673	499.803	489.955
		230.529	228.734	456.761	469.409
		206.26	217.012	442.926	493.267
	ratio of apoptotic cells (%)	0.2	0.25	0.16	0.37
		0.26	0.27	0.34	0.29
		0.22	0.17	0.31	0.31
		0.26	0.24	0.38	0.19
		0.19	0.24	0.31	0.39
		0.23	0.2	0.21	0.36
