# Supplementary material for: Intermittent hypoxia mediated by TSP1 dependent on STAT3 induces cardiac fibroblast activation and cardiac fibrosis
Source: eLife. 2020 Jan 14;9:e49923. doi: 10.7554/eLife.49923 (PMC6992386; doi:10.7554/eLife.49923)
Supplement: Figure 1—source data 1. [file elife-49923-fig1-data1.xlsx]

## Sheet: Figure1
		PBS		Ang II
		Normoxia	IH	Normoxia	IH
	HW/TL ratio (mg/mm)	7.4	8.4	9.1	9.6
		7.8	7.2	9.7	10.2
		6.9	7.9	10	10
		7	7.6	7.8	10.8
		6.4	7.4	9.3	9.8
		6.7	8	8.4	10.4
	Ejection fraction(%)	81.054	72.674	52.178	40.168
		81.826	69.468	76.184	41.827
		83.878	71.055	66.838	47.182
		86.655	76.134	54.825	47.739
		79.633	83.615	57.217	40.168
		76.134	79.941	58.262	41.827
	Fractional shorting(%)	48.232	41.165	26.21	19.411
		48.795	38.178	43.721	20.255
		51.374	39.416	36.308	23.308
		54.472	43.86	27.692	24.031
		46.417	48.738	29.284	19.411
		43.86	46.053	30.123	20.255
	fibrotic area (%)	0.59	1.84	2.96	7.95
		0.31	2.64	3.06	5.15
		0.73	1.71	3.18	5.37
		0.37	2.34	3.4	3.86
		0.49	2.48	3.51	5.02
		0.62	1.81	2.45	4.69
	VIME+α-SMA+area (fold of control)	0.674556	3.47929	5.9645	11.1479
		1.34911	4.04734	6.74556	14.4142
		0.923077	2.80473	6.85207	9.83432
		0.568047	3.79882	7.06509	7.59763
		1.27811	3.26627	5.18343	11.0769
		1.2071	3.12426	7.70414	11.574
	Col1 fluorescence int (fold of control)	1.00459	1.09991	2.12041	2.94401
		1.03052	1.85299	1.91921	2.42808
		1.09923	1.46043	1.8384	3.47449
		1.20267	1.65225	2.05587	3.18881
		0.706216	1.87298	1.93562	2.92969
		0.956775	1.52425	1.53572	3.17028
	periostin fluorescence int (fold of control)	1.10479	2.18292	2.16316	3.52819
		0.596659	2.26045	1.89526	3.66275
		1.12333	2.08642	2.36925	3.50978
		0.760884	1.98669	2.63928	3.87368
		1.47177	1.23012	2.28687	3.80547
		0.942565	1.19181	2.65761	3.50966
	α-SMA protein level (fold of control)	0.937882	1.42132	1.91027	4.14293
		0.944152	1.44234	1.92444	4.25004
		0.947268	1.50373	1.97883	4.62214
		0.974153	1.51857	2.11127	4.88608
		1.08719	1.79232	2.13846	3.68742
		1.11086	1.79655	2.7868	3.89048
	Periostin protein level (fold of control)	0.971792	1.58289	2.91697	5.48396
		1.01163	1.64285	2.95002	5.03279
		1.01658	1.59345	2.78031	5.12868
		1.05334	1.58532	2.43098	6.32622
		0.976725	1.59905	2.41734	6.41818
		0.969938	1.59084	2.54116	6.30452
	Col1 protein level (fold of control)	0.982803	1.3868	1.74916	2.97888
		1.00672	1.2709	2.11158	3.19623
		1.01046	1.28846	1.87967	2.95079
		1.01253	1.33455	1.50012	2.63602
		0.988157	1.31637	1.48533	2.61497
		0.999314	1.37431	1.46774	2.87457
	Acta2 mRNA level (fold of control)	0.9259	1.44234	1.91027	4.14293
		0.950617	1.50373	1.92444	4.25004
		0.983325	1.51857	1.97883	4.62214
		1.01704	1.59746	2.11127	4.88608
		1.05731	1.64451	2.13846	6.50034
		1.06327	1.73511	2.7868	6.98844
	Postn mRNA level (fold of control)	0.920704	1.62443	2.56181	4.59809
		0.9541	1.70892	2.56688	5.69987
		1.1252	1.74564	2.94309	4.74734
		0.900025	1.46392	2.59111	4.9245
		0.949454	1.62294	2.61307	5.49198
		1.15052	1.94902	3.14249	5.95325
	Col1a1 mRNA level (fold of control)	0.643672	2.38184	3.10574	8.32304
		0.846213	2.38898	3.16635	8.68703
		1.01729	1.77428	3.53582	8.80872
		1.12022	2.03151	3.6897	8.89857
		1.1617	2.0618	4.01446	9.49589
		1.21091	2.19183	4.04237	10.6896
