# Supplementary material for: Intermittent hypoxia mediated by TSP1 dependent on STAT3 induces cardiac fibroblast activation and cardiac fibrosis
Source: eLife. 2020 Jan 14;9:e49923. doi: 10.7554/eLife.49923 (PMC6992386; doi:10.7554/eLife.49923)
Supplement: Figure 2—source data 1. [file elife-49923-fig2-data1.xlsx]

## Sheet: Fig2A-G
		PBS		Ang II
		Normoxia	IH	Normoxia	IH
	TSP1 in plasma (ng/mL)	6.24	12.47	26.61	43.48
		5.02	13.69	24.63	52.17
		5.02	13.53	27.52	42.72
		5.48	12.47	27.06	45.61
		4.57	13.08	24.78	54.18
		4.11	12.17	21.74	31.01
	Thbs1 mRNA level (fold of control)	0.864012	1.90595	4.72393	7.29983
		0.89021	2.55692	5.33272	11.1437
		0.923169	3.19563	5.56842	11.8224
		1.00669	3.55791	6.67395	12.1461
		1.1566	3.61083	6.78415	12.8465
		1.15933	4.24219	7.00192	13.0924
	TSP1 protein level (fold of control)	1.00898	2.01381	3.01959	4.09818
		0.991015	1.97964	3.38878	4.23746
		0.882118	2.02418	3.77285	6.05309
		0.867949	2.43408	3.2588	5.62331
		1.11652	2.14278	3.57165	5.62018
		1.13341	2.90533	3.91945	5.2061
	p-SMAD2/3/t-SMAD2/3 level (fold of control)	1.21609	1.30084	1.83831	3.01525
		0.783911	1.22803	1.84807	2.95215
		1.03412	1.26866	1.52443	2.89076
		0.965883	1.43882	1.63132	3.04187
		0.842436	1.43894	1.33766	3.11565
		1.15756	1.38566	1.72551	3.14659
	TSP1 fluorescence int (fold of control)	1.03846	2.63077	2.97692	8.7
		1.03846	2.67692	3.04615	8.4
		1.08462	2.05385	3.04615	5.97692
		0.876923	2.23846	3.04615	6.36923
		0.969231	2.23846	3.06923	7.08462
		0.992308	1.91538	3.57692	6.34615
	ratio of TSP1+ cells to CFs (%)	35	72.2
		45.8	68.9
		39.4	79.7
		28.8	74.3
		37.9	64.2
		38.8	54.8

## Sheet: Fig2H
	TSP1 in plasma(ng/mL)
	Healthy subject(n=21)	OSA patients(n=21)
	1571.16	1013.08
	3612.88	1461.73
	1014.57	7332.13
	829.124	5224.88
	2508.36	2781.63
	664.847	1915.94
	1843.64	3838.7
	1229.47	5747.6
	1248.76	1883.45
	1906.36	1776.22
	1070.25	5108.26
	1031.01	2916.02
	907.974	1325.42
	3940.95	1373.61
	1496.21	2121.8
	2579.87	1520.53
	2456.91	782.489
	929.526	4127.57
	2075.94	4803.3
	855.592	6101.53
	1041.52	2913.72
