# Supplementary material for: Intermittent hypoxia mediated by TSP1 dependent on STAT3 induces cardiac fibroblast activation and cardiac fibrosis
Source: eLife. 2020 Jan 14;9:e49923. doi: 10.7554/eLife.49923 (PMC6992386; doi:10.7554/eLife.49923)
Supplement: Figure 3—source data 1. [file elife-49923-fig3-data1.xlsx]

## Sheet: Fig3B-E
		Normoxia	IH
	α-SMA fluorescence Int. (fold of control)	0.464918	6.49541
		1.11662	8.48733
		1.7743	5.81464
		0.678118	2.95803
		0.966042	6.17292
	ratio of Ki67+ cells (fold of control)	1.03	1.55
		0.89	1.77
		0.49	1.86
		1.24	3.55
		1.35	2.53
	Gel contraction (fold of control)	1.4271	3.62264
		0.740995	3.39623
		1.09091	3.15609
		0.740995	3.39623
	Thbs1 mRNA level (fold of control)	1.16516	3.32034
		0.834239	3.23492
		1.0006	2.59876
		1.03162	3.68168
		1.05797	3.74405

## Sheet: Fig3G
		Normoxia	IH
		0	2	4	8
	TSP1 protein level (fold of control)	1	2.76116	2.45063	1.82102
		1	2.30175	2.61088	2.17459
		1	2.28621	2.34057	2.58875
		1	2.66921	2.67471	1.722

## Sheet: Fig3H-I
		shCtrl		shThbs1
		Norm	IH	Norm	IH
	Col1a1 mRNA level (fold of control)	0.939546	2.84353	0.91708	1.64917
		1.02544	3.32156	0.833322	1.74804
		0.972859	2.92835	1.10591	1.8206
		0.990866	2.74756	0.905969	1.56237
		1.07128	2.60955	0.79964	1.84657
	Postn mRNA level (fold of control)	0.96214	2.16118	0.931295	1.27766
		0.996903	2.73513	1.01538	1.31733
		1.02097	2.26261	1.09538	1.27565
		0.991998	2.33287	1.01302	1.42518
		1.02799	2.29613	0.848373	1.4918
	Acta2 mRNA level (fold of control)	0.965226	2.38503	1.00876	1.15128
		0.97852	2.8581	1.00337	1.24187
		1.01596	2.42849	1.16926	1.28172
		1.05874	2.27792	1.12579	1.29932
		0.981548	2.24321	0.884199	1.29201
	Tnfa mRNA level (fold of control)	1.025	1.73946	1.11672	1.2737
		0.974996	2.00586	1.17588	1.43444
		1	2.32328	0.896438	1.61781
		1	2.4573	1.04213	1.56629
		1	2.77132	0.953545	1.05336
	Thbs1 mRNA level (fold of control)	0.977059	1.8091	0.377968	0.394796
		1.10852	2.54748	0.323196	0.417373
		0.914992	2.14345	0.362178	0.361891
		0.987261	1.62696	0.291055	0.288237
		1.01274	1.80109	0.32805	0.307226

## Sheet: Fig3K
		shCtrl			shThbs1
		Normoxia	IH		Normoxia	IH
			24h	48h		24h	48h
	Col1 protein level (fold of control)	0.999996	1.82218	1.72122	1.05123	1.24692	1.27894
		1.00002	1.87886	1.71108	1.01916	1.25335	1.20548
		0.999995	1.8035	1.66282	1.01543	1.37232	1.34007
		0.991685	1.99381	1.9029	1.18202	1.16583	1.14522
	periostin protein level (fold of control)	1.00008	2.16735	2.07686	0.915362	0.962457	0.968249
		1.00002	1.68672	1.5959	0.81043	1.10458	1.26495
		1	1.60333	1.3308	0.959172	1.19221	1.06142
		1	2.26979	2.22485	1.35191	1.27636	1.22325
	α-SMA protein level (fold of control)	1.0001	1.58697	1.32974	0.913718	1.25926	1.0678
		0.999964	1.27944	1.41504	0.787646	1.10098	1.10281
		1.00001	1.34296	1.15661	0.854323	1.1016	0.989547
		1	1.41455	1.39635	0.930534	1.06878	1.06584
	TSP1 protein level (fold of control)	1	1.94321	1.3862	0.642776	0.771218	0.818955
		0.999996	1.75987	1.70606	0.336948	0.539381	0.520547
		0.999998	1.57915	1.69999	0.562722	0.795824	0.775752
		0.999997	1.57489	1.61327	0.419215	0.466907	0.590836
