# Supplementary material for: Intermittent hypoxia mediated by TSP1 dependent on STAT3 induces cardiac fibroblast activation and cardiac fibrosis
Source: eLife. 2020 Jan 14;9:e49923. doi: 10.7554/eLife.49923 (PMC6992386; doi:10.7554/eLife.49923)
Supplement: Figure 4—source data 1. [file elife-49923-fig4-data1.xlsx]

## Sheet: Fig4B
		Normoxia	IH
			0.5h	1h	2h
	p-STAT3(Y705)/STAT3 (fold of control)	1	2.15987	2.33735	1.79977
		1	2.07727	2.27066	1.87636
		1	2.28365	2.56105	1.73666
		1	2.50498	2.0324	1.7452
	p-STAT3(S727)/STAT3 (fold of control)	1.3578	1.46699	1.47927	1.46064
		0.748124	0.758533	1.00602	0.836199
		0.894078	0.920426	0.88543	0.792914
		1	0.953608	0.924471	1.03544
	p-JAK1(Y1034/1035)/JAK1 (fold of control)	0.999998	0.951255	0.982155	1.0058
		0.999999	0.925331	0.909963	0.993501
		1	0.988973	1.09154	0.89408
		1.00001	1.11542	1.03226	1.13406
	p-JAK2(Y1008)/JAK2 (fold of control)	0.999999	1.38596	1.71003	2.39702
		0.999951	1.43125	1.99089	2.35254
		1	1.55081	1.84556	2.25123
		0.999994	1.43105	1.95031	2.54181
	p-JAK3(Y980/981)/JAK3 (fold of control)	1	1.02258	1.06349	1.05978
		1	1.17413	0.944324	0.938135
		1	1.00111	1.02119	1.01842
		1	0.81456	0.891341	0.938121

## Sheet: Fig4D
		Ctrl		TG101209
		Norm	IH	Norm	IH
	p-JAK2(Y1008)/JAK2 (fold of control)	1	2.42761	1.11444	1.2389
		0.999972	1.9492	0.820809	1.26232
		1	1.93604	1.13169	1.39817
		1	2.07896	1.17361	1.79003
	p-STAT3(Y705)/STAT3 (fold of control)	1	1.87816	1.05737	1.34401
		1	2.30182	1.15685	1.23898
		0.999795	2.11434	1.00424	1.22281
		1	2.0549	1.11323	1.426

## Sheet: Fig4F
		Normoxia	IH
	ratio of STAT3 in nuclear (%)	26	58
		22	60
		22	55
		21	62
		25	57

## Sheet: Fig4H
		Normoxia	IH
	p-STAT3(Y705)/STAT3 (fold of control)	0.9616	1.34537
		1.00941	1.56693
		1.07763	1.61316
		0.899149	1.27818
		0.978022	1.53192
		1.0742	1.58628
	p-STAT3(S727)/STAT3 (fold of control)	1	1.03884
		0.938789	0.771241
		1.30629	0.720181
		0.870001	1.30924
		0.998229	0.817982
		1.05888	0.726093
