# Supplementary material for: Intermittent hypoxia mediated by TSP1 dependent on STAT3 induces cardiac fibroblast activation and cardiac fibrosis
Source: eLife. 2020 Jan 14;9:e49923. doi: 10.7554/eLife.49923 (PMC6992386; doi:10.7554/eLife.49923)
Supplement: Figure 5—figure supplement 1—source data 1. [file elife-49923-fig5-figsupp1-data1.xlsx]

## Sheet: Sheet1
		IgG		STAT3 Ab
		Norm	IH	Norm	IH
	%input	2.17	1.82	5.86	12.29
		2.18	2.47	7.16	12.01
		1.83	1.78	5.78	13.93
		2.26	1.81	6.14	13.52
