# Supplementary material for: Intermittent hypoxia mediated by TSP1 dependent on STAT3 induces cardiac fibroblast activation and cardiac fibrosis
Source: eLife. 2020 Jan 14;9:e49923. doi: 10.7554/eLife.49923 (PMC6992386; doi:10.7554/eLife.49923)
Supplement: Figure 5—source data 1. [file elife-49923-fig5-data1.xlsx]

## Sheet: Fig5A-C
		siCtrl		siSTAT3
		Normoxia	IH	Normoxia	IH
	Acta2 mRNA level (fold of control)	1.03067	2.59379	0.885201	1.20653
		1.00865	2.54428	0.849438	1.15725
		0.999671	2.42955	0.883216	1.16819
		0.996022	2.42153	0.924133	1.20801
		0.986604	2.47344	0.860542	1.18617
	Col1a1 mRNA level (fold of control)	0.91731	3.13483	0.865743	1.75215
		0.936677	3.18797	0.8346	1.82716
		0.95803	3.36565	0.809771	1.7258
		1.04684	3.13535	0.916348	1.77869
		1.00897	3.22027	0.865596	1.82588
	Postn mRNA level (fold of control)	1.07327	2.29466	0.859154	1.21578
		1.09892	2.40513	0.795897	1.24271
		0.950837	2.15619	0.915609	1.25186
		0.952795	2.35892	0.879599	1.36259
		0.953076	2.11678	0.848784	1.29402
	Thbs1 mRNA level (fold of control)	0.977059	1.8091	0.377968	0.394796
		1.10852	2.54748	0.323196	0.417373
		0.914992	2.14345	0.362178	0.361891
		0.987261	1.62696	0.291055	0.288237
		1.01274	1.80109	0.32805	0.307226
	Stat3 mRNA level (fold of control)	1	0.946057	0.189747	0.186498
		0.989764	0.978352	0.197737	0.189787
		0.922179	0.807313	0.211508	0.203113
		1.07289	0.881115	0.204558	0.264805
		1.01517	0.874214	0.272335	0.187946
	TSP1 protein level (fold of control)	0.946371	1.75134	0.576406	1.37265
		1.21048	1.81211	0.786066	1.28355
		0.843153	1.78293	0.775006	1.39316
		1	1.91239	0.727881	1.13144
	Col1 protein level (fold of control)	1	1.76649	0.841607	1.3668
		0.997981	1.86591	1.17829	1.56786
		1	2.37326	0.64832	1.28691
		1.00009	2.003	0.864355	1.28639
	periostin protein level (fold of control)	1.00604	1.84316	0.971019	1.40693
		1	2.40622	1.24516	1.34286
		1	2.86802	0.82909	1.44225
		1	2.06641	0.772292	1.49493
	STAT3 protein level (fold of control)	1.3362	1.49461	0.116183	0.206978
		0.957663	1.43824	0.507387	0.558754
		0.706134	0.881174	0.462955	0.295571
		1.00088	0.880097	0.491931	0.392192
	α-SMA protein level (fold of control)	1.17392	1.77394	1.0176	1.49262
		1.01848	1.70892	0.970792	1.23357
		0.807605	1.86634	1.01021	1.31512
		1	1.52984	0.860824	1.32053

## Sheet: Fig5D-F
		DMSO		S3I-201
		Normoxia	IH	Normoxia	IH
	Acta2 mRNA level (fold of control)	1.02756	2.52923	0.942206	1.44239
		1.03114	2.6789	0.930321	1.53007
		0.949497	2.58204	0.923741	1.57458
		0.947052	2.4524	1.01424	1.60964
		0.961393	2.76659	0.865983	1.61491
	Col1a1 mRNA level (fold of control)	0.906261	3.27768	0.919774	2.44799
		0.89263	3.56043	0.831826	2.61597
		1.00096	3.86031	0.806802	2.58043
		1.01642	3.74627	0.912617	2.84399
		1.03036	3.68414	0.927067	2.48481
	Postn mRNA level (fold of control)	0.9858	2.09029	0.852648	1.37778
		1.0612	2.21948	0.777335	1.45722
		1.0391	2.17739	0.909438	1.35335
		0.900952	2.08689	0.903845	1.51737
		1.01032	2.18232	0.830306	1.47434
	Thbs1 mRNA level (fold of control)	1.11455	2.45345	0.842575	0.827418
		1.04236	2.57452	1.05659	0.949743
		0.843634	2.79909	0.900059	0.881972
		0.999451	3.12819	0.918615	0.910258
		1	2.87373	0.950695	0.926411
	TSP1 protein level (fold of control)	1.00001	1.87235	1.02536	1.33842
		1.00002	1.8744	1.01439	1.34173
		0.999999	1.58594	1.1844	1.20734
		1	1.61894	1.14497	1.46365
	Col1 protein level (fold of control)	0.999999	2.49773	1.15425	1.24082
		1	1.44058	0.920924	1.10366
		0.999999	2.09855	1.02886	1.3
		1	1.45998	1.09565	1.27633
	periostin protein level (fold of control)	0.999998	2.13822	1.21144	1.29283
		0.999999	1.69528	0.931522	1.11061
		1	1.63219	0.978994	1.09341
		0.999999	1.68509	1.05668	1.22548
	α-SMA protein level (fold of control)	1	1.44004	0.993111	1.06739
		0.999999	1.68649	1.00195	1.14632
		1	1.58073	1.0067	1.26642
		1	1.42366	0.9392	1.01544
