# Supplementary material for: Intermittent hypoxia mediated by TSP1 dependent on STAT3 induces cardiac fibroblast activation and cardiac fibrosis
Source: eLife. 2020 Jan 14;9:e49923. doi: 10.7554/eLife.49923 (PMC6992386; doi:10.7554/eLife.49923)
Supplement: Figure 6—figure supplement 1—source data 1. [file elife-49923-fig6-figsupp1-data1.xlsx]

## Sheet: B-E
		DMSO	S3I-201
	HW/TL ratio (mg/mm)	9.6	10
		10.3	10.3
		10.2	11.1
		10.2	10.1
		10.6	10.3
		10	10.1
	Ejection fraction(%)	31.07	34.18
		41.62	45.78
		51.1	56.21
		52.91	58.2
		43.28	32.32
		53.14	55.03
	fibrotic area (%)	1.82	2.37
		2.73	2.84
		2.23	1.59
		2.59	2.98
		1.19	1.932
		3.16	2.65

## Sheet: G
		AAV9-Postn prom-shScramble	AAV9-Postn prom-shStat3
	ratio of TSP1+ cells to CFs (%)	92.1	61.4
		93.1	63.6
		92.9	55.3
		92.2	64.3
		90.7	62.3
		92.6	56.8

## Sheet: H-K
		IH
		PBS	ANG II	PBS	ANGII
		AAV9-Postn prom-shScramble		AAV9-Postn prom-shSta3
	HW/TL ratio (mg/mm)	7.9	9.6	7.5	7.6
		8	10.2	8.2	8.1
		6.9	9.8	6.8	10.2
		7.8	9.9	7	9.2
		7.4	11	7.7	9.4
		8.4	9.8	8	9.7
	Ejection fraction(%)	75.1902	53.168	73.3067	53.332
		76.5777	47.133	60	48.877
		78.9497	44.515	77.5331	64.2
		72.6883	49.482	81.7882	64.571
		69.4814	46.548	76.3786	58.8798
		71.0684	41.9352	81.8739	62.7149
	fibrotic area (%)	2.31	5.51	1.24	2.21
		2.24	4.9	1.12	2.55
		1.89	4.53	1.25	2.65
		1.78	5.45	1.37	1.94
		2.32	6.54	1.22	2.78
		2.42	5.26	1.24	2.49
