# Supplementary material for: Intermittent hypoxia mediated by TSP1 dependent on STAT3 induces cardiac fibroblast activation and cardiac fibrosis
Source: eLife. 2020 Jan 14;9:e49923. doi: 10.7554/eLife.49923 (PMC6992386; doi:10.7554/eLife.49923)
Supplement: Figure 6—source data 1. [file elife-49923-fig6-data1.xlsx]

## Sheet: Fig6B-E
		IH
		PBS	ANG II	PBS	ANGII
		DMSO		S3I-201
	HW/TL ratio (mg/mm)	7	9.6	7.7	8.7
		7.6	10.2	8	8.2
		7.5	9.8	6.7	7.9
		7.2	10.6	5.6	8.4
		7.9	10.5	6.8	8.6
		8.4	11.1	6	7.2
	Ejection fraction(%)	73.233	39.467	72.531	61.147
		70.002	41.697	76.482	61.389
		71.601	45.665	76.712	62.173
		75.72	48.416	80.922	67.052
		83.16	46.108	86.454	67.161
		79.506	41.714	81.007	68.198
	fibrotic area (%)	1.84	7.95	0.7	1
		2.64	5.15	0.34	0.86
		1.71	5.37	0.38	0.5
		2.34	3.86	0.45	0.46
		2.48	5.02	0.18	0.57
		0.81	2.69	0.31	0.63
	VIME+ α-SMA+area (fold of control)	1.0173	3.25952	0.031142	0.394464
		1.18339	4.21453	0.425606	0.363322
		0.820069	2.87543	0.49827	0.446367
		1.11073	2.22145	0.446367	0.301038
		0.955017	3.23875	0.373702	0.425606
		0.913495	3.38408	0.269896	0.384083
	TSP1 fluorescence int (fold of control)	1.04844	2.89619	0.487889	0.757785
		1.14187	3.5917	0.519031	0.83045
		1.16263	3.53979	0.519031	1.21453
		0.861592	3.55017	0.456747	1.29758
		0.882353	2.63668	0.467128	0.529412
		0.903114	2.81315	0.352941	0.602076
	Col1 fluorescence int (fold of control)	0.895584	2.19529	0.650211	1.1297
		1.09574	2.26256	0.683264	1.13572
		0.983599	1.64104	0.814383	1.20582
		1.04413	2.01964	0.816228	1.26722
		0.857976	2.04068	0.859369	1.10226
		1.12296	2.05668	0.713983	1.13572
	periostin fluorescence int (fold of control)	0.89554	1.67774	0.854523	1.35486
		1.29086	1.9317	0.688672	1.41016
		0.922318	2.20447	0.762929	1.47002
		1.06781	1.91177	0.814704	1.2082
		0.821244	1.91177	0.56972	1.19036
		1.00222	2.34598	0.56972	1.16873

## Sheet: Fig6H
		PBS			Ang II
		Normoxia	IH		Normoxia	IH
			DMSO	S3I-201		DMSO	S3I-201
	TSP1 protein level (fold of control)	1.31179	1.96114	1.27512	3.077	5.73772	2.3788
		0.981735	2.35449	1.21393	3.31992	6.14547	2.32449
		0.610434	1.92433	1.26263	2.81954	3.66869	1.73917
		1.40579	2.05656	1.4312	2.51604	4.07796	1.93449
		0.955333	2.14099	1.11976	3.06392	3.86902	2.22898
		0.727856	2.32964	1.00751	2.895	4.82487	2.47036
	periostin protein level (fold of control)	0.925971	1.45084	0.890628	2.5702	3.81025	1.53133
		0.889722	1.5461	0.794786	2.57787	4.5858	1.6772
		1.12655	1.87357	0.918193	2.74108	4.97393	2.04237
		1.19435	1.43629	0.773028	2.20095	5.41216	1.85261
		1.03236	1.49981	0.830682	2.22273	4.36606	1.93702
		0.831051	1.8522	1.01404	2.32004	4.84935	1.77208
	Col1 protein level (fold of control)	0.904616	1.35559	0.752801	2.39588	3.28485	1.86866
		1.03313	1.30774	1.25788	2.31467	3.11892	1.90454
		1.39467	1.37589	1.15319	2.22241	3.31726	2.01989
		1.16468	1.2848	0.757843	2.22657	3.1545	1.91564
		0.878209	1.30542	1.05115	2.17866	3.16861	2.05337
		0.624692	1.40542	0.979178	2.29383	3.13728	1.99774
	α-SMA protein level (fold of control)	0.97628	1.59547	0.921935	3.01981	5.50376	2.80327
		1.02372	1.67222	0.909706	2.9463	4.95944	2.93135
		1.01444	1.66605	1.09304	2.21804	3.78208	2.77146
		1.00541	1.70679	1.05457	2.01556	4.03373	2.69808
		1.00791	1.66165	1.09617	2.43664	4.02462	2.66991
		0.972242	1.68773	1.05412	2.40395	3.87079	2.67644
	p-STAT3(Y705)/t-STAT3 level (fold of control)	1	1.62482	1.3988	2.18871	2.69763	1.67804
		1.05287	1.80373	1.55073	2.03804	2.49015	1.33099
		0.901642	1.49949	1.10337	1.93506	2.76052	1.81234
		1.04617	1.43221	1.31048	1.97529	2.56291	1.93585
		0.915085	1.56212	1.19337	2.15628	2.62907	1.81939
		1.1371	1.65094	1.37562	2.02319	2.84852	1.76926
